# Supplementary material
Source: PubMed Central journal article supplement (PMC7489372)
Supplement: jamaotolaryngolheadnecksurg-e202404-s001.pdf [file jamaotolaryngolheadnecksurg-e202404-s001.pdf]

## Supplementary Online Content

Malik A, Nair S, Sonawane K, et al. Outcomes of a telephone-based questionnaire for follow-up of patients who have completed curative-intent treatment for oral cancers. *JAMA Otolaryngol Head Neck Surg*. Published online September 3, 2020. doi:10.1001/jamaoto.2020.2404

### **eAppendix.** Telephone-Based Questionnaire

This supplementary material has been provided by the authors to give readers additional information about their work.

**eAppendix. Telephone-Based Questionnaire**

|                                                                 |                                                                                                                                                                                                                                                                            |                                     |                                     |                                    |
|-----------------------------------------------------------------|----------------------------------------------------------------------------------------------------------------------------------------------------------------------------------------------------------------------------------------------------------------------------|-------------------------------------|-------------------------------------|------------------------------------|
| 1.                                                              | How is your mouth opening?                                                                                                                                                                                                                                                 | <input type="checkbox"/> Decreased  | <input type="checkbox"/> Same       | <input type="checkbox"/> Improved  |
| 2.                                                              | Are you able to take food adequately?                                                                                                                                                                                                                                      | <input type="checkbox"/> Yes        | <input type="checkbox"/> No         |                                    |
| 3.                                                              | Are you having problem in speaking or in communication?                                                                                                                                                                                                                    | <input type="checkbox"/> Yes        | <input type="checkbox"/> No         |                                    |
| 4.                                                              | Did you notice any new growth/ulcer in the mouth?                                                                                                                                                                                                                          | <input type="checkbox"/> Yes        | <input type="checkbox"/> No         | <input type="checkbox"/> Can't say |
| 5.                                                              | Any appearance of pain/increase in pain in head neck region?                                                                                                                                                                                                               | <input type="checkbox"/> Yes        | <input type="checkbox"/> No         |                                    |
| 6.                                                              | Does it get relieved with medication?                                                                                                                                                                                                                                      | <input type="checkbox"/> Yes        | <input type="checkbox"/> No         |                                    |
| 7.                                                              | Do you feel any new swelling or lump in the neck?                                                                                                                                                                                                                          | <input type="checkbox"/> Yes        | <input type="checkbox"/> No         |                                    |
| 8.                                                              | Any loss of weight?                                                                                                                                                                                                                                                        | <input type="checkbox"/> Yes        | <input type="checkbox"/> No         |                                    |
| 9.                                                              | Any haemoptysis?                                                                                                                                                                                                                                                           | <input type="checkbox"/> Yes        | <input type="checkbox"/> No         |                                    |
| 10.                                                             | Any bone pain?                                                                                                                                                                                                                                                             | <input type="checkbox"/> Yes        | <input type="checkbox"/> No         |                                    |
| 11.                                                             | Did you have to visit any doctor since the last follow up for any problem?                                                                                                                                                                                                 | <input type="checkbox"/> Yes        | <input type="checkbox"/> No         |                                    |
| If yes, please write details:                                   |                                                                                                                                                                                                                                                                            |                                     |                                     |                                    |
| Follow-up - during Out Patient visit-before clinical evaluation |                                                                                                                                                                                                                                                                            |                                     |                                     |                                    |
| 12.                                                             | Have you been on regular 3 monthly follow up?                                                                                                                                                                                                                              | <input type="checkbox"/> Yes        | <input type="checkbox"/> No         |                                    |
|                                                                 | If no, then please write reason(s)                                                                                                                                                                                                                                         |                                     |                                     |                                    |
| 13.                                                             | Duration since last follow up                                                                                                                                                                                                                                              |                                     |                                     |                                    |
| 14.                                                             | We are developing a new model for follow up of oral cancer patients                                                                                                                                                                                                        |                                     |                                     |                                    |
|                                                                 | a) We will be seeing you in outpatient clinic every 3 months like now<br>b) We will contact you over phone after 3 months and enquire about your symptoms and will ask you to come for a consult if required. Otherwise you will have scheduled follow-ups every 6 months. |                                     |                                     |                                    |
|                                                                 | Which model do you like ?                                                                                                                                                                                                                                                  | <input type="checkbox"/> a.         | <input type="checkbox"/> b.         |                                    |
| 15.                                                             | Will periodic telephonic interview about your symptoms rather than a personal visit to the hospital be acceptable to you?                                                                                                                                                  | <input type="checkbox"/> Yes        | <input type="checkbox"/> No         |                                    |
| 16.                                                             | How much does the present follow up visit cost you financially?                                                                                                                                                                                                            | <input type="checkbox"/> Not at all | <input type="checkbox"/> Little bit | <input type="checkbox"/> Somewhat  |
|                                                                 |                                                                                                                                                                                                                                                                            | <input type="checkbox"/> Very much  |                                     |                                    |
| 17.                                                             | Annual income:                                                                                                                                                                                                                                                             |                                     |                                     |                                    |

|     |                                                               |  |
|-----|---------------------------------------------------------------|--|
| 18. | Distance travelled / Hours travelled to come for appointment: |  |
| 19. | Travel and other costs incurred:                              |  |
| 20. | Loss of income anticipated due to the follow up visit:        |  |
